# Supplementary material for: Investigation of Potential Gut Health Biomarkers in Broiler Chicks Challenged by Campylobacter jejuni and Submitted to a Continuous Water Disinfection Program
Source: MDPI journal article supplement (doi:10.3390/pathogens13050356), 2024-04-26
Supplement: s1 [file s1]

Article

# Investigation of potential gut health biomarkers in broiler chicks challenged by *Campylobacter jejuni* and submitted to a continuous water disinfection program

Tilemachos Mantzios <sup>1,2\*</sup>, Despoina E. Kiouisi <sup>2</sup>, Georgia D. Brellou <sup>3\*</sup>, Georgios A. Papadopoulos <sup>4</sup>, Vangelis Economou <sup>5</sup>, Marili Vasilogianni <sup>6</sup>, Elisavet Kanari <sup>2</sup>, Evanthia Petridou <sup>7</sup>, Ilias Giannenas <sup>8</sup>, Guillermo Tellez-Isaias <sup>9</sup>, Aglaia Pappa <sup>2</sup>, Alex Galanis <sup>2</sup> and Vasilios Tsiouris <sup>1</sup>.

Table S1. Analysis of the starter, grower, and finisher diets.

| Calculated analysis (g/kg) | Starter diet (1 <sup>st</sup> -13 <sup>th</sup> day) | Grower diet (14 <sup>th</sup> -23 <sup>rd</sup> day) | Finisher (24 <sup>th</sup> -36 <sup>th</sup> day) |
|----------------------------|------------------------------------------------------|------------------------------------------------------|---------------------------------------------------|
| Moisture                   | 11.11                                                | 10.87                                                | 10.95                                             |
| Crude protein              | 21.84                                                | 20.62                                                | 17.83                                             |
| Crude fat                  | 5.52                                                 | 6.58                                                 | 6.96                                              |
| Crude fiber                | 2.64                                                 | 2.86                                                 | 2.96                                              |
| Starch                     | 38.13                                                | 36.79                                                | 38.76                                             |
| Crude Ash                  | 9.44                                                 | 9.80                                                 | 8.98                                              |
| Sugars                     | 4.16                                                 | 4.31                                                 | 4.45                                              |
| Calcium                    | 1.31                                                 | 1.57                                                 | 1.68                                              |
| Phosphorus                 | 0.57                                                 | 0.51                                                 | 0.46                                              |
| Energy (Mj/kg)             | 3.000                                                | 3.075                                                | 3.150                                             |

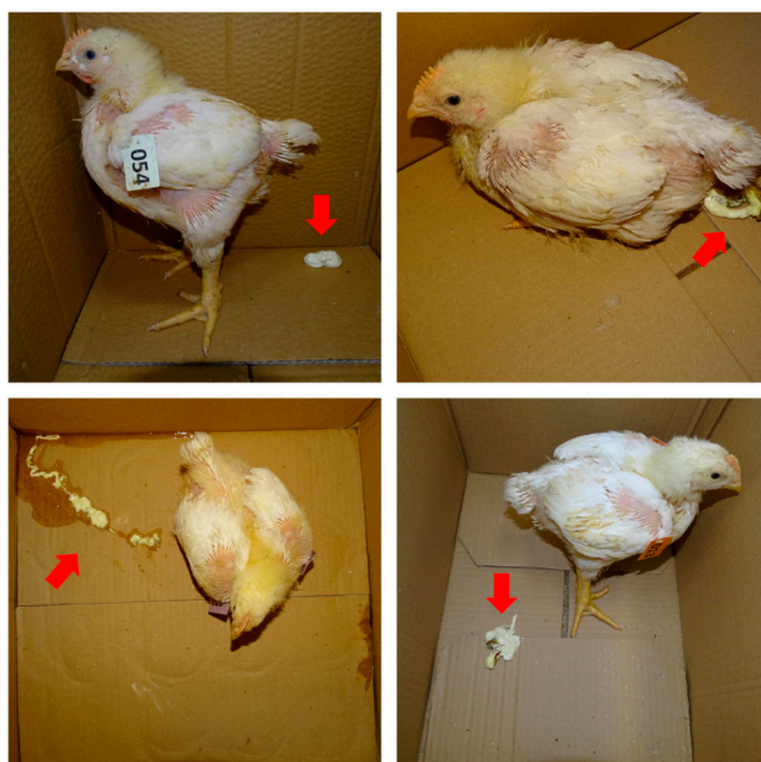

**Figure S1.** Discharge of white-stained fecal droplets (indicated by the red arrows) following the barium sulfate administration for the determination of the WITT in broiler chicks.

**Table S2.** Effect of the drinking water disinfection on IL-10 (pg/ml), cortisol (ng/ml) and FITC-d (ng/g) levels in the serum of *C. jejuni* experimentally challenged broiler chicks ( $\bar{x} \pm \text{SEM}$ ).

| Serum biomarker     | Group A<br>(Negative control) | Group B<br>(Cid 2000™) | Group C<br>( <i>C. jejuni</i> ) | Group D<br>(Cid 2000™ & <i>C. jejuni</i> ) | <i>P</i> value |
|---------------------|-------------------------------|------------------------|---------------------------------|--------------------------------------------|----------------|
| IL-10<br>(pg/ml)    | 129.63±41.99                  | 32.55±11.33            | 96.93±50.33                     | 88.18±49.93                                | 0.278          |
| Cortisol<br>(ng/ml) | 0.38±0.14 <sup>a</sup>        | 0.11±0.04 <sup>a</sup> | 0.90±0.12 <sup>b</sup>          | 0.27±0.13 <sup>a</sup>                     | <0.001         |
| FITC-d<br>(ng/g)    | 0.02±0.01 <sup>a</sup>        | 0.04±0.01 <sup>a</sup> | 0.05±0.01 <sup>a</sup>          | 0.09±0.02 <sup>b</sup>                     | 0.004          |

<sup>a,b</sup> Means in the same row with a different superscript differ significantly ( $p \leq 0.05$ ). IL-10: Interleukin-10; FITC-d: Fluorescein isothiocyanate dextran

**Table S3.** Effect of the drinking water disinfection on ovotransferrin concentration (ng/g) in the feces of *C. jejuni* experimentally challenged broiler chicks ( $\bar{x} \pm \text{SEM}$ ).

| Faecal biomarker         | Group A<br>(Negative control) | Group B<br>(Cid 2000™)  | Group C<br>( <i>C. jejuni</i> ) | Group D<br>(Cid 2000™ & <i>C. jejuni</i> ) | <i>P</i> value |
|--------------------------|-------------------------------|-------------------------|---------------------------------|--------------------------------------------|----------------|
| Ovotransferrin<br>(ng/g) | 5.75±0.30 <sup>a</sup>        | 13.95±0.57 <sup>b</sup> | 5.72±0.17 <sup>a</sup>          | 16.25±0.54 <sup>c</sup>                    | <0.001         |

<sup>a,b,c</sup> Means in the same row with a different superscript differ significantly ( $p \leq 0.05$ ).

**Table S4.** Effect of the drinking water disinfection on the whole intestinal transit time (WITT) of barium sulfate in *C. jejuni* experimentally challenged broiler chicks ( $\bar{x} \pm \text{SEM}$ ).

| Faecal biomarker     | Group A<br>(Negative control) | Group B<br>(Cid 2000™)    | Group C<br>( <i>C. jejuni</i> ) | Group D<br>(Cid 2000™ & <i>C. jejuni</i> ) | <i>P</i> value |
|----------------------|-------------------------------|---------------------------|---------------------------------|--------------------------------------------|----------------|
| WITT<br>(in minutes) | 91.92±11.65 <sup>a,b</sup>    | 130.33±27.64 <sup>b</sup> | 61.55±6.51 <sup>a</sup>         | 77.17±15.76 <sup>a</sup>                   | 0.050          |

<sup>a,b</sup> Means in the same row with a different superscript differ significantly ( $p \leq 0.05$ ).

**Table S5.** Effect of the drinking water disinfection on the gut (duodenum, jejunum, ileum) histomorphometry of *C. jejuni* experimentally challenged broiler chicks ( $\bar{x} \pm \text{SEM}$ ).

| Parameter       | Group A<br>(Negative control) | Group B<br>(Cid 2000™)     | Group C<br>( <i>C. jejuni</i> ) | Group D<br>(Cid 2000™ & <i>C. jejuni</i> ) | <i>P</i><br>value |
|-----------------|-------------------------------|----------------------------|---------------------------------|--------------------------------------------|-------------------|
| <i>Duodenum</i> |                               |                            |                                 |                                            |                   |
| VH              | 1011.30±92.92                 | 1283.16±173.63             | 1240.98±142.28                  | 1175.71±87.37                              | 0.532             |
| VW              | 93.94±7.96                    | 112.30±7.92                | 99.10±5.71                      | 130.07±11.48                               | 0.125             |
| CD              | 147.51±0.49                   | 148.37±8.15                | 139.70±2.82                     | 144.83±0.95                                | 0.550             |
| VH/CD           | 6.96±0.62                     | 8.80±1.65                  | 8.95±0.90                       | 8.19±0.59                                  | 0.568             |
| <i>Jejunum</i>  |                               |                            |                                 |                                            |                   |
| VH              | 982.48±19.25 <sup>a</sup>     | 1237.77±94.65 <sup>b</sup> | 1208.90±60.14 <sup>a,b</sup>    | 1401.03±31.84 <sup>b</sup>                 | 0.033             |
| VW              | 90.86±6.31                    | 143.62±25.52               | 139.19±1.63                     | 122.62±11.78                               | 0.177             |
| CD              | 139.27±5.26                   | 170.73±3.18                | 159.67±6.29                     | 153.26±9.63                                | 0.105             |
| VH/CD           | 7.11±0.42                     | 7.41±0.70                  | 7.72±0.71                       | 9.26±0.77                                  | 0.248             |
| <i>Ileum</i>    |                               |                            |                                 |                                            |                   |
| VH              | 807.99±59.18 <sup>a,b#</sup>  | 866.18±67.73 <sup>b#</sup> | 622.48±44.04 <sup>a#</sup>      | 724.29±8.51 <sup>a,b#</sup>                | 0.092             |
| VW              | 90.71±2.29 <sup>a#</sup>      | 132.26±10.62 <sup>b#</sup> | 112.39±6.97 <sup>a,b#</sup>     | 108.02±6.63 <sup>a,b#</sup>                | 0.066             |
| CD              | 113.40±5.18 <sup>a</sup>      | 145.41±2.37 <sup>b</sup>   | 139.81±8.71 <sup>b</sup>        | 114.35±4.58 <sup>a</sup>                   | 0.032             |
| VH/CD           | 7.28±0.12 <sup>b</sup>        | 6.12±0.64 <sup>b</sup>     | 4.50±0.04 <sup>a</sup>          | 6.47±0.27 <sup>b</sup>                     | 0.021             |

<sup>a,b</sup> Means in the same row with a different superscript differ significantly ( $P \leq 0.05$ ). <sup>#</sup> Means in the same row with a different superscript tend to differ significantly ( $P \leq 0.10$ ). VH: Villus Height (μm); VW: Villus Width (μm); CD: Crypt Depth (μm); VH/CD: Villus Height to Crypt depth ratio.
